# Supplementary material for: Monitoring the differential ordering of enantiomers included into cyclodextrins through deuterium NMR in lyotropic liquid crystals
Source: Royal Society of Chemistry journal article supplement (doi:10.1039/b205256c), 2002-01-01
Supplement: b205256c.doc [file b205256c.doc]

Supplementary data

Monitoring the differential ordering of enantiomers included into cyclodextrins through deuterium NMR in lyotropic liquid crystals

Jean-Marie Péchiné, Abdelkrim Meddour and Jacques Courtieu*

Laboratoire de Chimie Structurale Organique

ICMO, CNRS ESA n° 8074

Université Paris-Sud. Bat. 410.

91405 Orsay cedex, France.

Fax: (+33)1-69-15-81-05

E-mail : courtieu@icmo.u-psud.fr

# Products

-cyclodextrin (**1a**) and hydroxypropyl--cyclodextrin (**1b**) were commercial products from Aldrich and cromolyn (cromoglycic acid sodium salt) (**2**) was purchased from Sigma. Racemic 1-deutero-1-phenylethanol (**3a**) was synthesised by the classical reduction of acetophenone with LiAlD4. (*S*)-1-deutero-1-phenylethanol (33% ee) (**3b**) was prepared by trans-esterification of (**3a**) with vinyl acetate and *Pseudomonas s.p*. lipase (K. Laumen, D. Breitgoff, M. P. Schnedeir, *J. Chem. Soc., Chem. Comm*. **1988**, *22*, 1459-1461.). The enzyme was purchased from Amano. The products were characterised by NMR and GC-MS.

**Solutions preparation**

Mother solutions of **3a** (0.0125%) and -CyD (0.018%) in water were prepared. Final solutions (≈ 500mg) were directly made in the NMR tube. First, adequate volume of the **3a**-mother solution was introduced in the tube to get 1mg of **3a**, then the adequate volume of solution **1a** was added in order to get around 9-10 mg of -CyD. Afterwards water was added to obtain a 420-430 mg solution in the NMR tube. Finally 70-80 mg of cromolyn were introduced. The NMR tube was hermetically closed and centrifuged back and forth several times. After 2 days at ambient temperature and centrifugation, the entire solid was dissolved and a homogenous solution was obtained. The NMR tube was then stored in the refrigerator.

All the solutions were prepared using the same protocol and almost the same concentrations of **1 (a** or **b**), **2** and **3** (**a** or **b**) in water. These concentrations were 83%-84% water, 2-3% **1** (**a** or **b**), 14% of **2** and 0.15% of the test product **3** (**a** or **b**) by weight. The molar ratio **3**/**1** was maintained around unity.

# NMR spectra recording

The proton-decoupled deuterium (2H-{1H}) NMR spectra were recorded on a Bruker DRX-400 spectrometer at 61.4 MHz. Temperature was controlled using the BVT-1000 temperature regulation system (T = ±0,1 K). Samples were spun at about 20 Hz. Broad-band proton decoupling was achieved by applying the WALTZ-16 composite pulse sequence. 1500 to 5000 transients were necessary to achieve a reasonable signal to noise ratio.
